## Volume 4 Spring Issue

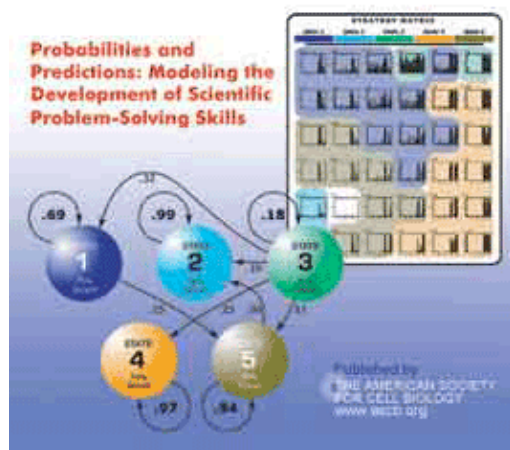

### Table of Contents

Use Arrows to Browse Previous Issues

### Contact CBE

8120 Woodmont Avenue Suite 750  
Bethesda, Maryland 20814-2762  
Phone: (301) 347-9300  
Fax: (301) 347-9350  
cbe@ascb.org

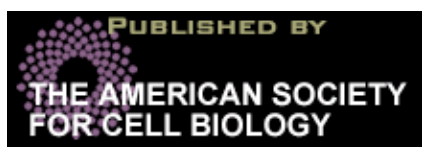

## FEATURES

- **Approaches to Biology Teaching and Learning: From a Scholarly Approach to Teaching to the Scholarship of Teaching**  
by Deborah Allen and Kimberly Tanner
- **From the National Academies: Medical School Admissions Requirements and Undergraduate Science Education**  
by Jay B. Labov
- **Video Views and Reviews: Cytokinesis: A Phenomenon Overlooked Too Often**  
by Christopher Watters
- **Meeting Report: Synthetic Biology Jamboree for Undergraduates**  
by A. Malcolm Campbell
- **Meeting Report: Building Bridges for Diverse Professors of Tomorrow**  
by Christian Dimaano and Ken Pepion
- **Points of View: Effective Partnerships Between K–12 and Higher Education**  
by Debra Tomanek; Nancy Moreno; Sarah C.R. Elgin, Susan Flowers, and Victoria May; Erin Dolan and Kimberly Tanner
- **A Useful How-To Guide for Course and Curricula Revisions**  
*Review of: Designing and Assessing Courses and Curricula: A Practical Guide, by Robert M. Diamond; 1998; 321 pp.; Jossey–Bass (San*

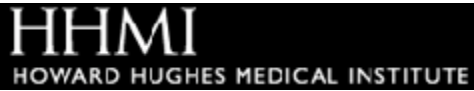

Supported in part by an Undergraduate Science Education Program grant from the Howard Hughes Medical Institute

Francisco); ISBN: 0-7879-1030-9  
by Joyce K Ono

- **Carlson Composes a Classic Review of: *Mendel's Legacy: The Origins of Classical Genetics*, by Elof Axel Carlson; 2004; 332 pp.; Cold Spring Harbor Laboratory Press (Cold Spring Harbor, NY); ISBN 0-8796-940716**  
by Millard Susman

## ARTICLES

---

- **Probabilities and Predictions: Modeling the Development of Scientific Problem-Solving Skills**  
by Ron Stevens, David F. Johnson, and Amy Soller
- **Developing Information Fluency in Introductory Biology Students in the Context of an Investigative Laboratory**  
by Gary J. Lindquenter, Romi L. Burks, and Carolyn R. Jaslow
- **Understanding of Genetic Information in Higher Secondary Students in Northeast India and the Implications for Genetics Education**  
by Ansuman Chattopadhyay

## ANNOUNCEMENTS

---

September 3-7, 2005, Sydney, Australia  
**15th International Society of Developmental Biologists Congress**

**Submit Your Manuscript**  
Online Manuscript Submission

- **Instructions to Authors**
- **Top Ten Reasons to Publish in CBE**

[pdf]

## Other Information:

There are **6,450** registered users signed up to receive quarterly notification of new content.

[Become a registered user.](#)

[Order a Free CBE Poster](#)

### On the Cover [\[Printable Cover\]](#)

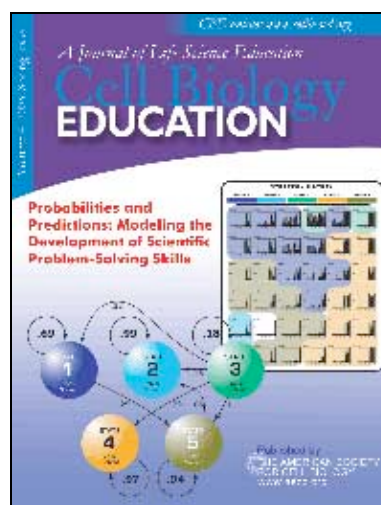

Modeling the development of scientific understanding.

This model illustrates the most likely strategic pathways students take as they learn how to solve problems in molecular genetics. The matrix shows the 36 most frequent strategies (as identified by artificial neural network analysis) students used while analyzing simulations. The state transition diagram shows the most likely pathways students will follow in their problem-solving strategies. Students in State 2 tend to guess at the solution and are not likely to change their approach without intervention, whereas students in State 3 tend to attack the problem in a variety of ways, progress to even more effective strategies (States 1, 4, and 5), and increase their chances of solving the problem.
